# Supplementary material for: CYP19A1 polymorphisms associated with coronary artery disease and circulating sex hormone levels in a Chinese population
Source: PubMed Central journal article supplement (PMC5722548; doi:10.18632/oncotarget.21626), 2017-10-07
Supplement: oncotarget-08-97101-s001.pdf [file oncotarget-08-97101-s001.pdf]

## **CYP19A1 polymorphisms associated with coronary artery disease and circulating sex hormone levels in a Chinese population**

### **SUPPLEMENTARY MATERIALS**

**Supplementary Table 1: Mean circulating hormone levels (ratios) and aromatase levels by CYP19A1 genotype in normal Uygur postmenopausal women. See Supplementary\_Table\_1**
